# Supplementary material
Source: publisher figshare collection journal article supplement (https://asha.figshare.com/articles/dataset/_/5313454)

**Supplemental Material S8.** Forest plot of Pearson's  $r$  for the relationship between toddlerhood receptive language and expressive language outcomes across studies.

## Meta-Analysis for Receptive Language

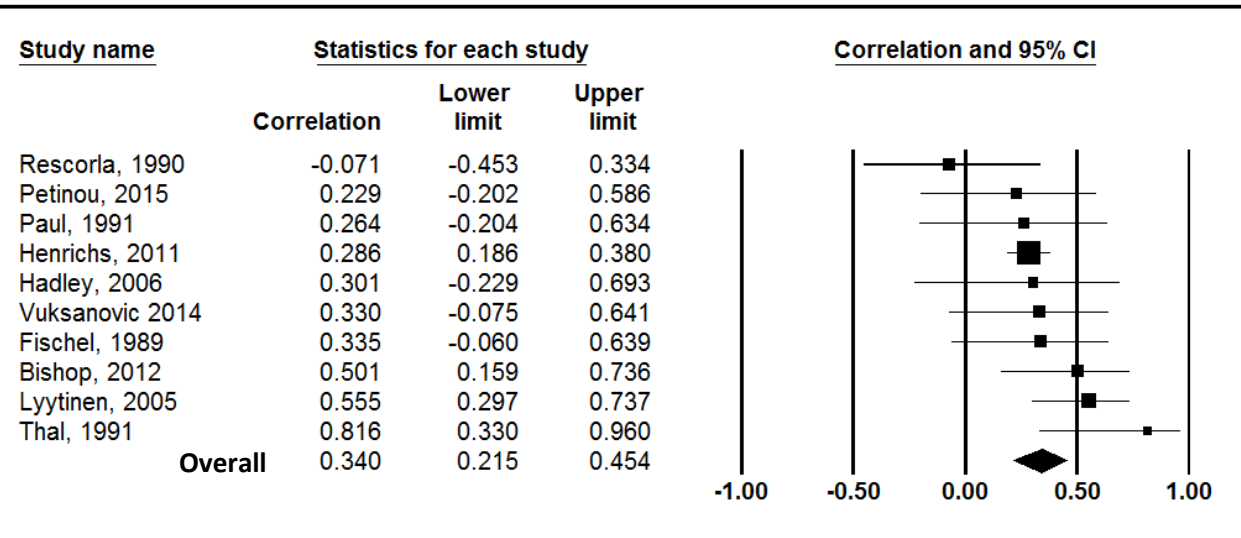

Supplement: Supplementary file 3 [file 1]
