# Supplementary material
Source: publisher figshare collection journal article supplement (https://asha.figshare.com/articles/dataset/_/5313454)

**Supplemental Material S9.** Funnel plot of Fisher's  $z$  on standard error for receptive language, showing approximate symmetry. The Duval Tweedie Trim and Fill correction does not change the main effect.

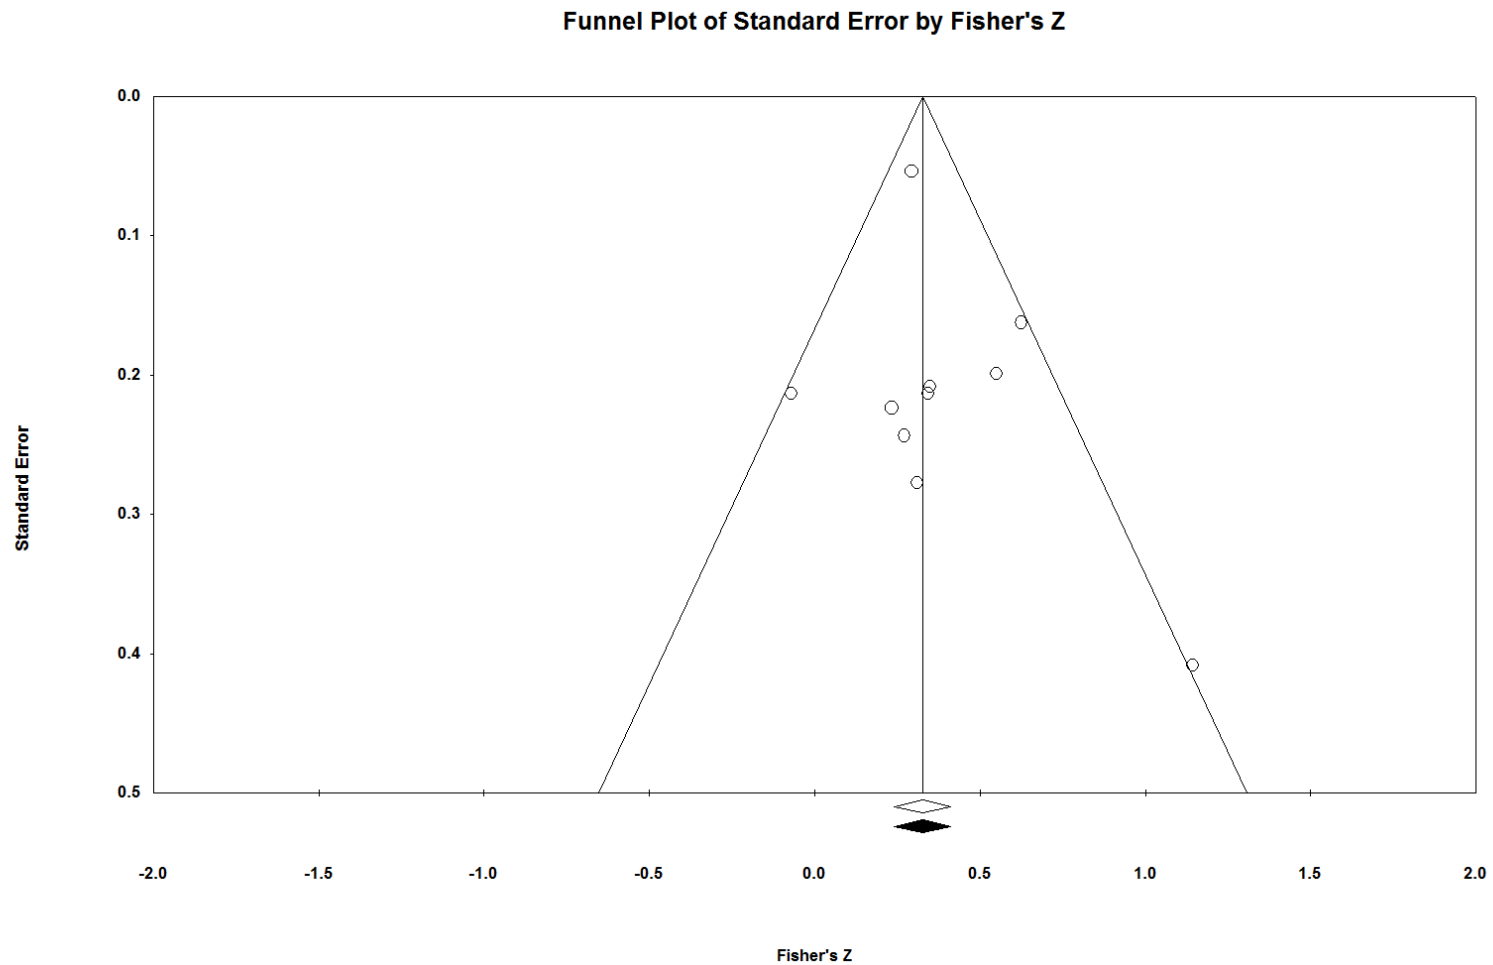

Supplement: Supplementary file 4 [file 1]
