# Supplementary material
Source: publisher figshare collection journal article supplement (https://asha.figshare.com/articles/dataset/_/5313454)

**Supplemental Material S6.** Forest plot of Pearson's  $r$  for the relationship between expressive vocabulary size and expressive language outcomes across studies.

## Meta-Analysis of Expressive Vocabulary Size

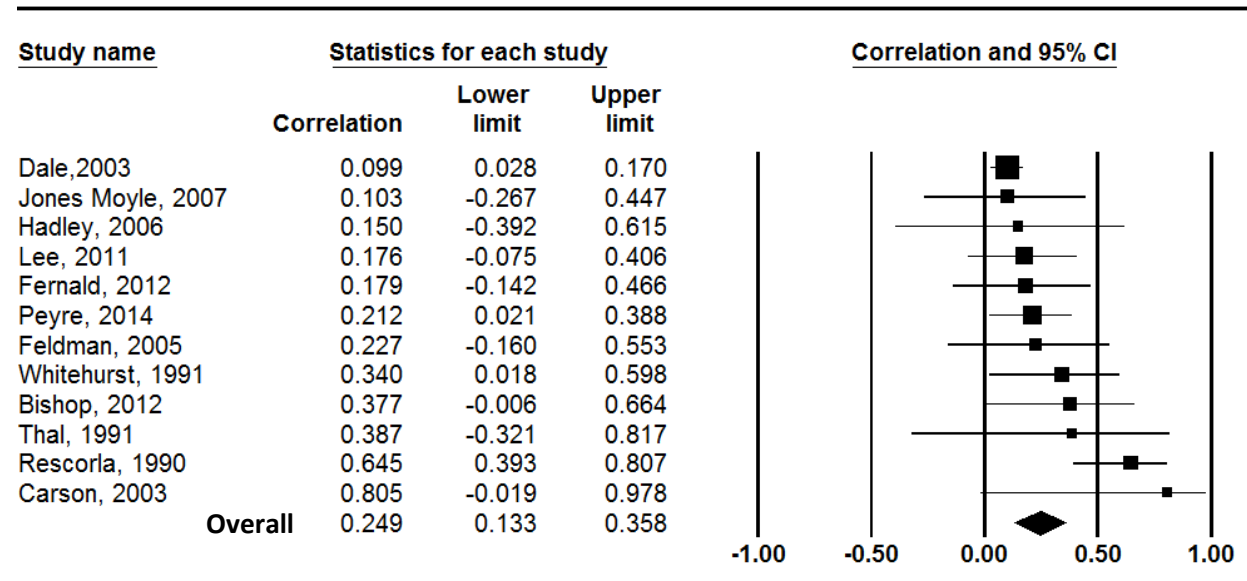

Supplement: Supplementary file 5 [file 1]
