# Supplementary material
Source: publisher figshare collection journal article supplement (https://asha.figshare.com/articles/dataset/_/5313454)

**Supplemental Material S10.** Forest plot of Pearson's  $r$  for the relationship between phrase speech and expressive language outcomes across studies.

## Meta-Analysis for Phrase Speech

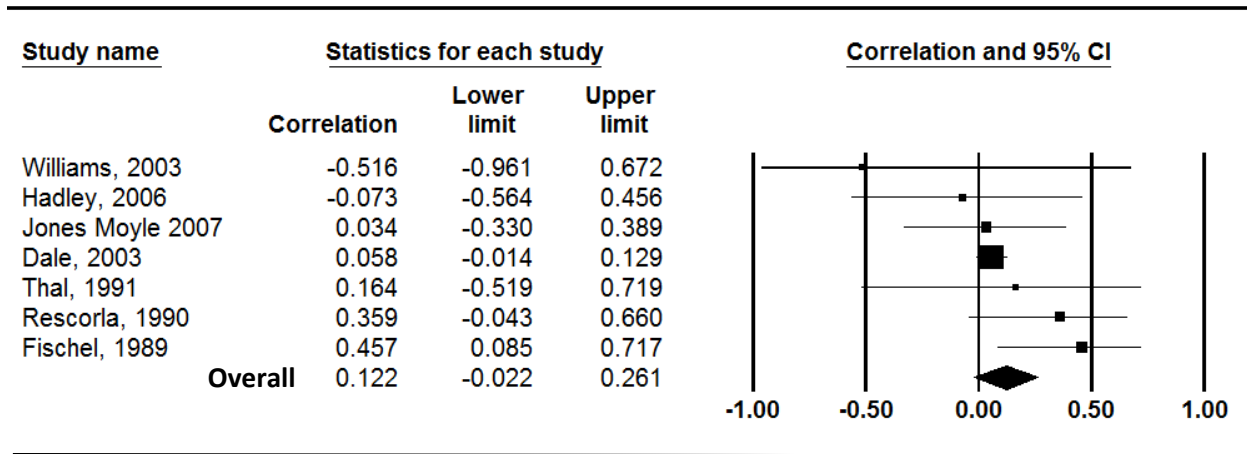

Supplement: Supplementary file 6 [file 1]
