# Supplementary material
Source: publisher figshare collection journal article supplement (https://asha.figshare.com/articles/dataset/_/5313454)

**Supplemental Material S13.** Forest plot of Cohen's  $d$  for the relationship between gender and expressive language outcomes across studies. Positive values indicate better outcomes among girls.

## Meta-Analysis for Gender

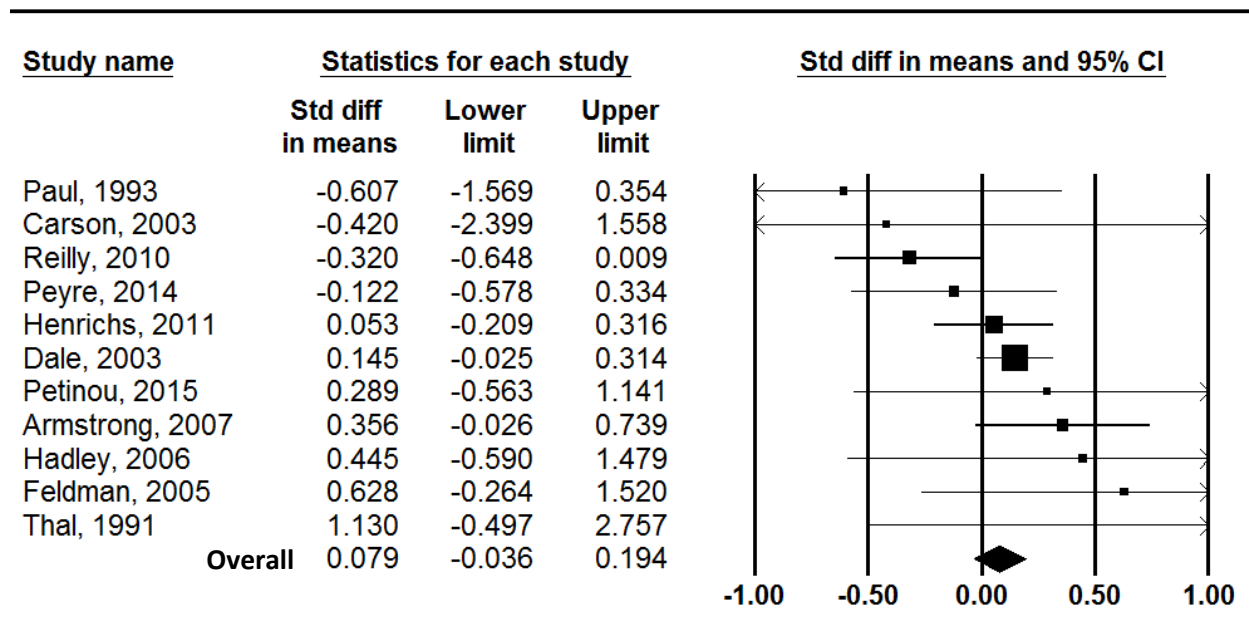

Supplement: Supplementary file 7 [file 1]
