# Supplementary material
Source: publisher figshare collection journal article supplement (https://asha.figshare.com/articles/dataset/_/5313454)

**Supplemental Material S15.** Forest plot of Cohen's  $d$  for the relationship between family history and expressive language outcomes across studies. Positive values indicate better outcomes among children without a family history of language or learning disorders.

## Meta-Analysis for Family History

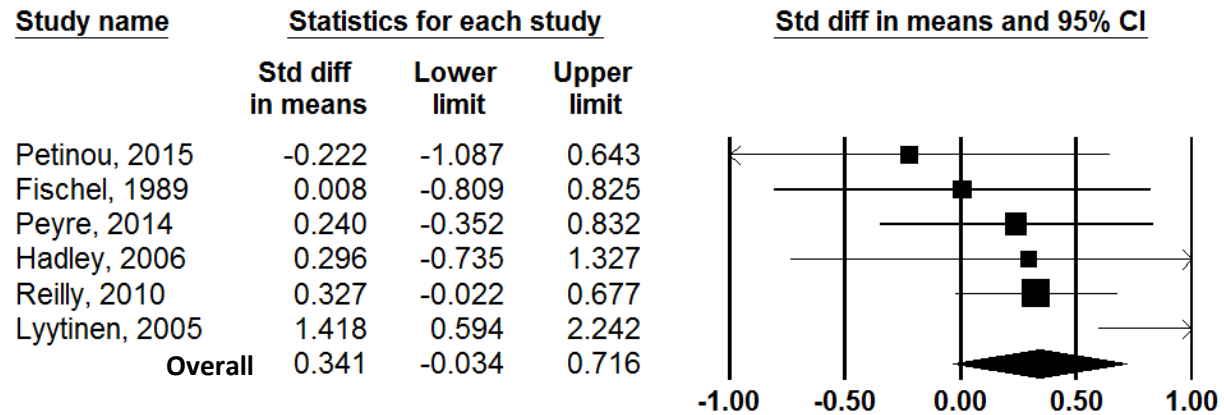

Supplement: Supplementary file 8 [file 1]
