# Supplementary material
Source: publisher figshare collection journal article supplement (https://asha.figshare.com/articles/dataset/_/5313454)
Supplement: Supplementary file 9 [file 1]

**Supplemental Material S2.** Measurement of predictors for each study.

| Study                                                        | Child assessment variables |                               |                        | Background information variables |             |                                                                     |
|--------------------------------------------------------------|----------------------------|-------------------------------|------------------------|----------------------------------|-------------|---------------------------------------------------------------------|
|                                                              | Expressive vocabulary size | Receptive language            | Phrase speech          | Socioeconomic status (SES)       | Gender      | Family history                                                      |
| Armstrong, 2007, & Lee, 2011                                 | CDI                        | —                             | —                      | Maternal edu.                    | Male/Female | —                                                                   |
| Bishop et al., 2012                                          | OCDI                       | MSEL Receptive                | —                      | Maternal edu.                    |             | —                                                                   |
| Carson et al., 2003                                          | LDS                        | —                             | —                      |                                  | Male/Female | —                                                                   |
| Dale et al., 2003                                            | CDI UK Short Form          | —                             | CDI UK Grammar         | Maternal edu.                    | Male/Female | —                                                                   |
| Feldman et al., 2005                                         | CDI                        | —                             | —                      | Maternal edu.                    | Male/Female | —                                                                   |
| Fernald & Marchman, 2012                                     | CDI                        | —                             | —                      | Maternal edu.                    |             | —                                                                   |
| Fischel et al., 1989, <sup>a</sup> & Whitehurst et al., 1991 | Informal parent report     | Informal parent report        | Informal parent report | Maternal edu.                    |             | Sibling with language delay                                         |
| Hadley & Short, 2005, & Hadley & Holt, 2006                  | CDI                        | PLS-3 AC                      | MLU                    | Maternal edu.                    | Male/Female | Family member with history of language or learning disability       |
| Henrichs et al., 2011                                        | CDI                        | CDI Word comprehension        | —                      | Maternal edu.                    | Male/Female | —                                                                   |
| Levickis et al., 2014                                        | —                          | —                             | —                      | Maternal edu.                    |             | —                                                                   |
| Lyytinen et al., 2005                                        | —                          | RDLS-4 Receptive <sup>b</sup> | —                      |                                  |             | Parent and at least one additional relative with reading disability |

| Study                           | Child assessment variables |                             |                                         | Background information variables |             |                                                                                      |
|---------------------------------|----------------------------|-----------------------------|-----------------------------------------|----------------------------------|-------------|--------------------------------------------------------------------------------------|
|                                 | Expressive vocabulary size | Receptive language          | Phrase speech                           | Socioeconomic status (SES)       | Gender      | Family history                                                                       |
| Moyle et al., 2007              | CDI                        | —                           | CDI Complexity and mean of 3 utterances |                                  |             | —                                                                                    |
| Paul et al., 1991, & Paul, 1993 | —                          | VABS Receptive <sup>b</sup> | —                                       |                                  |             | —                                                                                    |
| Petinou & Spanoudis, 2014       | —                          | PLS-3 AC                    | —                                       |                                  | Male/Female | 1st degree relative with history of language delay or learning disability            |
| Peyre et al., 2014              | CDI French Short Form      | —                           | —                                       | Parental edu.                    | Male/Female | Parent with history of language delay                                                |
| Reilly et al., 2010             | —                          | —                           | —                                       | Maternal edu.                    | Male/Female | Parent report of a family history of speech, language, literacy, or fluency problems |
| Rescorla & Schwartz, 1990       | LDS                        | RDLS-R Receptive            | MLU                                     | Maternal edu.                    |             | —                                                                                    |
| Thal et al., 1991               | LGI Production             | LGI Comprehension           | MLU                                     |                                  | Male/Female | —                                                                                    |
| Vuksanovic, 2015                | —                          | RDLS-R Receptive            | —                                       |                                  |             | —                                                                                    |
| Williams & Elbert, 2003         | —                          | —                           | Observed phrases <sup>b</sup>           |                                  |             | —                                                                                    |

*Note.* CDI = MacArthur Communicative Development Inventory; CDI UK SF = Communicative Development Inventory, United Kingdom, Short Form; ELI = Early Language Inventory; LDS = Language Development Survey; LGI = Language and Gesture Inventory (contains Expressive and Receptive Vocabulary sections); MLU = mean length of utterance in a language sample; MSEL = Mullen Scales of Early Learning; OCDI = Oxford University Communicative Development Inventory; PLS-3 AC = Preschool Language Scales–Third Edition, Auditory Comprehension; RDLS (R, 4) = Reynell Developmental Language Scales–Revised, Fourth Edition); SICD-R = Sequenced Inventory of Communicative Development–Revised; VABS = Vineland Adaptive Behavior Scales.

<sup>a</sup>Fischel, 1989, used an unstandardized parent interview. Parents were asked about child’s vocabulary size, understanding of instructions, and multi-word phrases.

<sup>b</sup>Predictor was converted from a continuous to a nominal format.

## References

- Armstrong, E. S. (2007). *School-age cognitive and achievement outcomes for late talkers and late bloomers: Do late bloomers really bloom?* Retrieved from ProQuest Information and Learning database. (Accession number 2007-99008-286)
- Bishop, D. V. M., Holt, G., Line, E., McDonald, D., McDonald, S., & Watt, H. (2012). Parental phonological memory contributes to prediction of outcome of late talkers from 20 months to 4 years: A longitudinal study of precursors of specific language impairment. *Journal of Neurodevelopmental Disorders*, 4, 3. <https://doi.org/10.1186/1866-1955-4-3>
- Carson, C. P., Klee, T., Carson, D. K., & Hime, L. K. (2003). Phonological profiles of 2-year-olds with delayed language development: Predicting clinical outcomes at age 3. *American Journal of Speech-Language Pathology*, 12, 28–39.
- Dale, P. S., Price, T. S., Bishop, D. V. M., & Plomin, R. (2003). Outcomes of early language delay: I. Predicting persistent and transient language difficulties at 3 and 4 years. *Journal of Speech, Language, and Hearing Research*, 46, 544–560.
- Feldman, H. M., Dale, P. S., Campbell, T. F., Colborn, D. K., Kurs-Lasky, M., Rockette, H. E., & Paradise, J. L. (2005). Concurrent and predictive validity of parent reports of child language at ages 2 and 3 years. *Child Development*, 76, 856–868. <https://doi.org/10.1111/j.1467-8624.2005.00882.x>
- Fernald, A., & Marchman, V. A. (2012). Individual differences in lexical processing at 18 months predict vocabulary growth in typically developing and late-talking toddlers. *Child Development*, 83, 203–222. <https://doi.org/10.1111/j.1467-8624.2011.01692.x>
- Fischel, J. E., Whitehurst, G. J., Caulfield, M. B., & DeBaryshe, B. (1989). Language growth in children with expressive language delay. *Pediatrics*, 83, 218–227.
- Hadley, P. A., & Holt, J. K. (2006). Individual differences in the onset of tense marking: A growth-curve analysis. *Journal of Speech, Language, and Hearing Research*, 49, 984–1000. [https://doi.org/10.1044/1092-4388\(2006/071\)](https://doi.org/10.1044/1092-4388(2006/071))
- Hadley, P. A., & Short, H. (2005). The onset of tense marking in children at risk for specific language impairment. *Journal of Speech, Language, and Hearing Research*, 48, 1344–1362. [https://doi.org/10.1044/1092-4388\(2005/094\)](https://doi.org/10.1044/1092-4388(2005/094))
- Henrichs, J., Rescorla, L., Schenk, J. J., Schmidt, H. G., Jaddoe, V. W. V., Hofman, A., . . . Tiemeier, H. (2011). Examining continuity of early expressive vocabulary development: The Generation R Study. *Journal of Speech, Language, and Hearing Research*, 54, 854–869. [https://doi.org/10.1044/1092-4388\(2010/09-0255\)](https://doi.org/10.1044/1092-4388(2010/09-0255))
- Lee, J. (2011). Size matters: Early vocabulary as a predictor of language and literacy competence. *Applied Psycholinguistics*, 32, 69–92. <https://doi.org/10.1017/S0142716410000299>
- Levickis, P., Reilly, S., Girolametto, L., Ukoumunne, O. C., & Wake, M. (2014). Maternal behaviors promoting language acquisition in slow-to-talk toddlers: Prospective community-based study. *Journal of Developmental & Behavioral Pediatrics*, 35, 274–281. <https://doi.org/10.1097/DBP.0000000000000056>
- Lyytinen, P., Eklund, K., & Lyytinen, H. (2005). Language development and literacy skills in late-talking toddlers with and without familial risk for dyslexia. *Annals of Dyslexia*, 55, 166–192.
- Moyle, M. J., Weismer, S. E., Evans, J. L., & Lindstrom, M. J. (2007). Longitudinal relationships between lexical and grammatical development in typical and late-talking children. *Journal of Speech, Language, and Hearing Research*, 50, 508–528.
- Paul, R. (1993). Patterns of development in late talkers: Preschool years. *Communication Disorders Quarterly*, 15(1), 7–14. <https://doi.org/10.1177/152574019301500103>
- Paul, R., Looney, S. S., & Dahm, P. S. (1991). Communication and socialization skills at ages 2 and 3 in “late-talking” young children. *Journal of Speech and Hearing Research*, 34, 858–865.
- Petinou, K., & Spanoudis, G. (2014). Early language delay phenotypes and correlation with later linguistic abilities. *Folia Phoniatrica et Logopaedica*, 66, 67–76. <https://doi.org/10.1159/000365848>
- Peyre, H., Bernard, J. Y., Forhan, A., Charles, M.-A., De Agostini, M., Heude, B., & Ramus, F. (2014). Predicting changes in language skills between 2 and 3 years in the EDEN mother–child cohort. *PeerJ*, 2, e335. <https://doi.org/10.7717/peerj.335>

- Reilly, S., Wake, M., Ukoumunne, O. C., Bavin, E., Prior, M., Cini, E., . . . Bretherton, L. (2010). Predicting language outcomes at 4 years of age: Findings from Early Language in Victoria Study. *Pediatrics*, *126*, e1530–e1537. <https://doi.org/10.1542/peds.2010-0254>
- Rescorla, L. A., & Schwartz, E. (1990). Outcome of toddlers with specific expressive language delay. *Applied Psycholinguistics*, *11*, 393–407. <https://doi.org/10.1017/S0142716400009644>
- Thal, D., Tobias, S., & Morrison, D. (1991). Language and gesture in late talkers: A 1-year follow-up. *Journal of Speech and Hearing Research*, *34*, 604–612.
- Vuksanovic, J. R. (2015). Relationship between social interaction bids and language in late talking children. *International Journal of Speech-Language Pathology*, *17*, 527–536.
- Whitehurst, G. J., Smith, M., Fischel, J. E., Arnold, D. S., & Lonigan, C. J. (1991). The continuity of babble and speech in children with specific expressive language delay. *Journal of Speech and Hearing Research*, *34*, 1121–1129.
- Williams, A. L., & Elbert, M. (2003). A prospective longitudinal study of phonological development in late talkers. *Language, Speech, and Hearing Services in Schools*, *34*, 138–153.
