# Supplementary material
Source: publisher figshare collection journal article supplement (https://asha.figshare.com/articles/dataset/_/5313454)

**Supplemental Material S7.** Funnel plot of Fisher's  $z$  on standard error for expressive vocabulary size, showing asymmetry. Empty shapes represent included studies and filled shapes represent the Duvall Tweedie Trim and Fill correction.

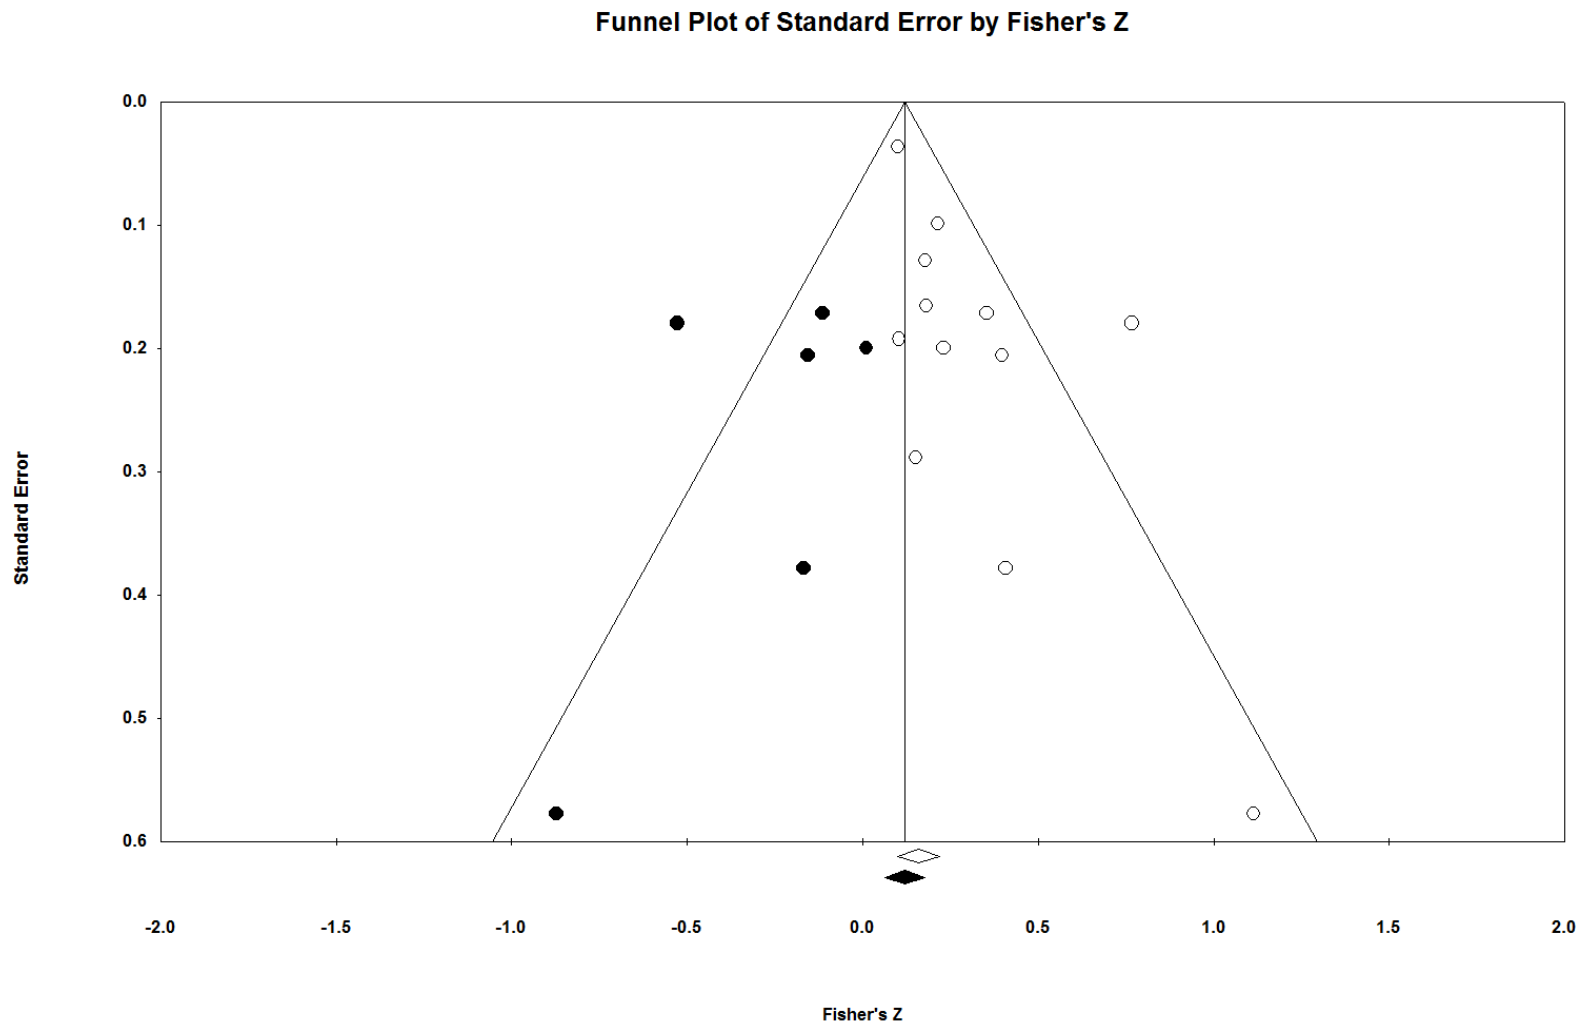

Supplement: Supplementary file 10 [file 1]
