# Supplementary material
Source: publisher figshare collection journal article supplement (https://asha.figshare.com/articles/dataset/_/5313454)
Supplement: Supplementary file 12 [file 1]

**Supplemental Material S4.** Comparison of vote-counting to meta-analysis.

| <b>Continuous predictors</b> | <b><i>k</i></b> | <b>Individual study findings % (<i>n</i>)</b> |                                         |                                         |                                     | <b>Main effect in meta-analysis</b> |
|------------------------------|-----------------|-----------------------------------------------|-----------------------------------------|-----------------------------------------|-------------------------------------|-------------------------------------|
|                              |                 | <b>Significant negative finding</b>           | <b>Non-significant negative finding</b> | <b>Non-significant positive finding</b> | <b>Significant positive finding</b> | <b><i>r</i></b>                     |
| Expressive vocabulary size   | 12              | 0 (0)                                         | 0 (0)                                   | 67 (8)                                  | 33 (4)                              | .251**                              |
| Receptive language           | 10              | 0 (0)                                         | 10 (1)                                  | 60 (6)                                  | 40 (4)                              | .340**                              |
| Phrase speech                | 7               | 0 (0)                                         | 29 (2)                                  | 57 (4)                                  | 14 (1)                              | .122                                |
| SES                          | 12              | 8 (1)                                         | 17 (2)                                  | 50 (6)                                  | 25 (3)                              | .111**                              |
| <b>Nominal predictors</b>    | <b><i>k</i></b> | <b>Significant negative finding</b>           | <b>Non-significant negative finding</b> | <b>Non-significant positive finding</b> | <b>Significant positive finding</b> | <b><i>d</i></b>                     |
| Gender                       | 11              | 0                                             | 36 (4)                                  | 64 (7)                                  | 0 (0)                               | .079                                |
| Family history               | 6               | 0                                             | 17 (1)                                  | 67 (4)                                  | 17 (1)                              | .341                                |

*Note.* *k* = number of studies in each meta-analysis; *r* = Pearson's *r*; *d* = Cohen's *d*; SES = socioeconomic status.

\**p* < .05. \*\**p* < .01.
