# Supplementary material
Source: publisher figshare collection journal article supplement (https://asha.figshare.com/articles/dataset/_/5313454)
Supplement: Supplementary file 14 [file 1]

## Supplemental Material S1. Inclusion and exclusion criteria.

| Study                        | Instrument used to determine late talking status | Cut-off                            | Exclusionary criteria                                                                                                                                                                                                                                                                                                                                 |
|------------------------------|--------------------------------------------------|------------------------------------|-------------------------------------------------------------------------------------------------------------------------------------------------------------------------------------------------------------------------------------------------------------------------------------------------------------------------------------------------------|
| Armstrong, 2007, & Lee, 2011 | CDI                                              | < 10th percentile                  | <ul style="list-style-type: none"> <li>• mother &lt; 18 years old</li> <li>• mother did not speak English</li> <li>• child was hospitalized for more than 7 days following birth or had an obvious disability</li> <li>• mother had a substance-abuse problem</li> <li>• Bayley-II Mental Development Index &lt; 70</li> </ul>                        |
| Bishop et al., 2012          | OCDI                                             | < 10 words                         | <ul style="list-style-type: none"> <li>• serious birth complications</li> <li>• abnormal hearing or vision</li> <li>• more than occasional exposure to non-English language</li> <li>• WPPSI-III Nonverbal IQ &lt; 85 at follow-up</li> </ul>                                                                                                         |
| Carson et al., 2003          | LDS                                              | < 50 words or no word combinations | —                                                                                                                                                                                                                                                                                                                                                     |
| Dale et al., 2003            | CDI UK Short Form                                | < 15 words                         | <ul style="list-style-type: none"> <li>• singletons (all participants were twins of known zygosity)</li> <li>• major medical disorders, perinatal hazards, or genetic syndromes</li> <li>• primary language other than English</li> </ul>                                                                                                             |
| Feldman et al., 2005         | CDI                                              | < -1 <i>SD</i> below mean          | <ul style="list-style-type: none"> <li>• low birth weight or small for gestational age</li> <li>• serious neonatal illness or congenital malformations</li> <li>• mother &lt; 18 years old</li> <li>• mother known to abuse drugs or alcohol</li> <li>• placement in foster care</li> <li>• any language other than English spoken in home</li> </ul> |
| Fernald & Marchman, 2012     | CDI                                              | < 20th percentile                  | <ul style="list-style-type: none"> <li>• pre-term birth or perinatal complications</li> <li>• serious illnesses</li> <li>• cognitive delays</li> </ul>                                                                                                                                                                                                |

| Study                                           | Instrument used to determine late talking status             | Cut-off                          | Exclusionary criteria                                                                                                                                                                                                                                                                                                                                                               |
|-------------------------------------------------|--------------------------------------------------------------|----------------------------------|-------------------------------------------------------------------------------------------------------------------------------------------------------------------------------------------------------------------------------------------------------------------------------------------------------------------------------------------------------------------------------------|
|                                                 |                                                              |                                  | <ul style="list-style-type: none"> <li>• impairments in hearing or vision</li> <li>• significant exposure to languages other than English</li> </ul>                                                                                                                                                                                                                                |
| Fischel et al., 1989, & Whitehurst et al., 1991 | EOWPVT                                                       | < -2.33 below mean               | <ul style="list-style-type: none"> <li>• nonverbal IQ &lt; 85 on Leiter</li> <li>• receptive language &lt; 85 on PPVT-R<sup>a</sup></li> <li>• autism indicated during child observation or parent interview</li> </ul>                                                                                                                                                             |
| Hadley & Short, 2005, & Hadley & Holt, 2006     | CDI                                                          | < 16th percentile                | <ul style="list-style-type: none"> <li>• any language other than English spoken in home</li> <li>• recurrent otitis media (&gt; 6 ear infections)</li> <li>• neurological, emotional, or behavioral impairments by parent report</li> <li>• abnormal hearing test</li> <li>• abnormal oral motor screening</li> <li>• below normal range nonverbal abilities on Leiter-R</li> </ul> |
| Henrichs et al., 2011                           | CDI-N                                                        | < 10th percentile                | <ul style="list-style-type: none"> <li>• family lives outside the study area</li> </ul>                                                                                                                                                                                                                                                                                             |
| Levickis et al., 2014                           | UK Sure Start language measure                               | < 20th percentile                | <ul style="list-style-type: none"> <li>• known cognitive delay or major medical problem</li> <li>• non-English-speaking parents</li> </ul>                                                                                                                                                                                                                                          |
| Lyytinen et al., 2005                           | Composite of CDI, Bayley-II Expressive, and RDL-4 Expressive | < -1 <i>SD</i> below mean        | <ul style="list-style-type: none"> <li>• any abnormalities on detailed neuropsychiatric examination conducted soon after birth</li> </ul>                                                                                                                                                                                                                                           |
| Moyle et al., 2007                              | CDI                                                          | < 10th percentile                | <ul style="list-style-type: none"> <li>• abnormal hearing test</li> <li>• abnormal oral motor abilities</li> <li>• delayed development in areas other than language on Denver II or parent report on background history questionnaire</li> </ul>                                                                                                                                    |
| Paul et al., 1991, & Paul, 1993                 | LDS                                                          | 18–23 months < 10 words OR 24–34 | <ul style="list-style-type: none"> <li>• parent or pediatrician report of any developmental abnormalities other than speech delay</li> </ul>                                                                                                                                                                                                                                        |

| Study                     | Instrument used to determine late talking status | Cut-off                                    | Exclusionary criteria                                                                                                                                                                                                                                                                                                                                                         |
|---------------------------|--------------------------------------------------|--------------------------------------------|-------------------------------------------------------------------------------------------------------------------------------------------------------------------------------------------------------------------------------------------------------------------------------------------------------------------------------------------------------------------------------|
|                           |                                                  | months < 50 words                          | <ul style="list-style-type: none"> <li>neurological or behavioral abnormality apparent to psychologist during assessment</li> <li>Bayley or SB2 &lt; 85</li> <li>abnormal hearing test</li> </ul>                                                                                                                                                                             |
| Petinou & Spanoudis, 2014 | CYLEX                                            | < 70 words                                 | <ul style="list-style-type: none"> <li>any language other than Greek spoken in the home</li> <li>parent report of developmental abnormalities or significant medical history</li> <li>abnormal hearing test</li> </ul>                                                                                                                                                        |
| Peyre et al., 2014        | CDI French Short Form                            | < 10th percentile                          | <ul style="list-style-type: none"> <li>mother did not speak French</li> <li>maternal diabetes or pregnancy with multiples</li> <li>known condition associated with speech/language delay, such as hearing or neurological impairment</li> </ul>                                                                                                                               |
| Reilly et al., 2010       | CDI                                              | < 10th percentile                          | <ul style="list-style-type: none"> <li>non-English-speaking parents</li> <li>serious disabilities or developmental delays</li> </ul>                                                                                                                                                                                                                                          |
| Rescorla & Schwartz, 1990 | LDS                                              | < 50 words or no word combinations         | <ul style="list-style-type: none"> <li>Bayley-II Mental Development Index &lt; 85</li> <li>RDLS Receptive age equiv. not within 3 mo. of chronological age<sup>a</sup></li> <li>abnormal hearing test</li> <li>abnormal social/emotional functioning according to psychologist observation</li> <li>abnormal neurological status as established by medical history</li> </ul> |
| Thal et al., 1991         | LGI                                              | < 10th percentile and no word combinations | <ul style="list-style-type: none"> <li>history of abnormal hearing test or repeated ear infections</li> <li>intellectual disability, behavioral disturbance, or neurological (oral/motor/sensory) deficits according to parent and pediatrician questionnaires</li> </ul>                                                                                                     |
| Vuksanovic, 2015          | Informal parent report                           | < 50 words and no                          | <ul style="list-style-type: none"> <li>family does not speak Serbian</li> </ul>                                                                                                                                                                                                                                                                                               |

| Study                   | Instrument used to determine late talking status | Cut-off           | Exclusionary criteria                                                                                                                                                                                                                                                                                                                              |
|-------------------------|--------------------------------------------------|-------------------|----------------------------------------------------------------------------------------------------------------------------------------------------------------------------------------------------------------------------------------------------------------------------------------------------------------------------------------------------|
|                         | and speech pathologist classroom observation     | word combinations | <ul style="list-style-type: none"> <li>• Apgar score less than 9 at 5 minutes after birth</li> <li>• preterm birth or prenatal complications</li> <li>• neurological disorders or psychopathological or behavioral issues</li> <li>• psychomotor developmental quotient on Brunet–Lezine scale &lt; 80</li> <li>• abnormal hearing test</li> </ul> |
| Williams & Elbert, 2003 | Informal parent report                           | < 50 words        | <ul style="list-style-type: none"> <li>• any prenatal, sensory, cognitive, or developmental concerns on parent case history form</li> <li>• organic or motor disorders evident during observation</li> <li>• abnormal hearing test</li> <li>• any language other than English spoken at home</li> </ul>                                            |

*Note.* Bayley (II) = Bayley Scales of Infant and Toddler Development–Second Edition; CDI (N) = MacArthur–Bates Communicative Development Inventory–Netherlands Edition; CYLEX = Cypress Lexical List; Denver II = Denver Developmental Screening Test–Second Edition; ELI = Early Language Inventory; LDS = Language Development Survey; Leiter (R) = Leiter International Performance Scale–Revised; LGI = Language and Gesture Inventory; ODCI = Oxford University Communicative Development Inventory; PLS = Preschool Language Scale; PPVT-R = Peabody Picture Vocabulary Test–Revised Edition; RDLS (4) = Reynell Developmental Language Scales–Fourth Edition; SB2 = Stanford–Binet Intelligence Scales–Second Edition; WPPSI-III = Wechsler Preschool and Primary Scales of Intelligence–Third UK Edition.

\*Study excluded participants with below average receptive language and was included in that moderation subgroup in meta-analysis for receptive language.

## References

- Armstrong, E. S. (2007). *School-age cognitive and achievement outcomes for late talkers and late bloomers: Do late bloomers really bloom?* Retrieved from ProQuest Information and Learning database. (Accession number 2007-99008-286)
- Bishop, D. V. M., Holt, G., Line, E., McDonald, D., McDonald, S., & Watt, H. (2012). Parental phonological memory contributes to prediction of outcome of late talkers from 20 months to 4 years: A longitudinal study of precursors of specific language impairment. *Journal of Neurodevelopmental Disorders*, 4, 3. <https://doi.org/10.1186/1866-1955-4-3>
- Carson, C. P., Klee, T., Carson, D. K., & Hime, L. K. (2003). Phonological profiles of 2-year-olds with delayed language development: Predicting clinical outcomes at age 3. *American Journal of Speech-Language Pathology*, 12, 28–39.
- Dale, P. S., Price, T. S., Bishop, D. V. M., & Plomin, R. (2003). Outcomes of early language delay: I. Predicting persistent and transient language difficulties at 3 and 4 years. *Journal of Speech, Language, and Hearing Research*, 46, 544–560.
- Feldman, H. M., Dale, P. S., Campbell, T. F., Colborn, D. K., Kurs-Lasky, M., Rockette, H. E., & Paradise, J. L. (2005). Concurrent and predictive validity of parent reports of child language at ages 2 and 3 years. *Child Development*, 76, 856–868. <https://doi.org/10.1111/j.1467-8624.2005.00882.x>
- Fernald, A., & Marchman, V. A. (2012). Individual differences in lexical processing at 18 months predict vocabulary growth in typically developing and late-talking toddlers. *Child Development*, 83, 203–222. <https://doi.org/10.1111/j.1467-8624.2011.01692.x>

- Fischel, J. E., Whitehurst, G. J., Caulfield, M. B., & DeBaryshe, B. (1989). Language growth in children with expressive language delay. *Pediatrics*, 83, 218–227.
- Hadley, P. A., & Holt, J. K. (2006). Individual differences in the onset of tense marking: A growth-curve analysis. *Journal of Speech, Language, and Hearing Research*, 49, 984–1000. [https://doi.org/10.1044/1092-4388\(2006/071\)](https://doi.org/10.1044/1092-4388(2006/071))
- Hadley, P. A., & Short, H. (2005). The onset of tense marking in children at risk for specific language impairment. *Journal of Speech, Language, and Hearing Research*, 48, 1344–1362. [https://doi.org/10.1044/1092-4388\(2005/094\)](https://doi.org/10.1044/1092-4388(2005/094))
- Henrichs, J., Rescorla, L., Schenk, J. J., Schmidt, H. G., Jaddoe, V. W. V., Hofman, A., . . . Tiemeier, H. (2011). Examining continuity of early expressive vocabulary development: The Generation R Study. *Journal of Speech, Language, and Hearing Research*, 54, 854–869. [https://doi.org/10.1044/1092-4388\(2010/09-0255\)](https://doi.org/10.1044/1092-4388(2010/09-0255))
- Lee, J. (2011). Size matters: Early vocabulary as a predictor of language and literacy competence. *Applied Psycholinguistics*, 32, 69–92. <https://doi.org/10.1017/S0142716410000299>
- Levickis, P., Reilly, S., Girolametto, L., Ukoumunne, O. C., & Wake, M. (2014). Maternal behaviors promoting language acquisition in slow-to-talk toddlers: Prospective community-based study. *Journal of Developmental & Behavioral Pediatrics*, 35, 274–281. <https://doi.org/10.1097/DBP.0000000000000056>
- Lyytinen, P., Eklund, K., & Lyytinen, H. (2005). Language development and literacy skills in late-talking toddlers with and without familial risk for dyslexia. *Annals of Dyslexia*, 55, 166–192.
- Moyle, M. J., Weismer, S. E., Evans, J. L., & Lindstrom, M. J. (2007). Longitudinal relationships between lexical and grammatical development in typical and late-talking children. *Journal of Speech, Language, and Hearing Research*, 50, 508–528.
- Paul, R. (1993). Patterns of development in late talkers: Preschool years. *Communication Disorders Quarterly*, 15(1), 7–14. <https://doi.org/10.1177/152574019301500103>
- Paul, R., Looney, S. S., & Dahm, P. S. (1991). Communication and socialization skills at ages 2 and 3 in “late-talking” young children. *Journal of Speech and Hearing Research*, 34, 858–865.
- Petinou, K., & Spanoudis, G. (2014). Early language delay phenotypes and correlation with later linguistic abilities. *Folia Phoniatrica et Logopaedica*, 66, 67–76. <https://doi.org/10.1159/000365848>
- Peyre, H., Bernard, J. Y., Forhan, A., Charles, M.-A., De Agostini, M., Heude, B., & Ramus, F. (2014). Predicting changes in language skills between 2 and 3 years in the EDEN mother–child cohort. *PeerJ*, 2, e335. <https://doi.org/10.7717/peerj.335>
- Reilly, S., Wake, M., Ukoumunne, O. C., Bavin, E., Prior, M., Cini, E., . . . Bretherton, L. (2010). Predicting language outcomes at 4 years of age: Findings from Early Language in Victoria Study. *Pediatrics*, 126, e1530–e1537. <https://doi.org/10.1542/peds.2010-0254>
- Rescorla, L. A., & Schwartz, E. (1990). Outcome of toddlers with specific expressive language delay. *Applied Psycholinguistics*, 11, 393–407. <https://doi.org/10.1017/S0142716400009644>
- Thal, D., Tobias, S., & Morrison, D. (1991). Language and gesture in late talkers: A 1-year follow-up. *Journal of Speech and Hearing Research*, 34, 604–612.
- Vuksanovic, J. R. (2015). Relationship between social interaction bids and language in late talking children. *International Journal of Speech-Language Pathology*, 17, 527–536.
- Whitehurst, G. J., Smith, M., Fischel, J. E., Arnold, D. S., & Lonigan, C. J. (1991). The continuity of babble and speech in children with specific expressive language delay. *Journal of Speech and Hearing Research*, 34, 1121–1129.
- Williams, A. L., & Elbert, M. (2003). A prospective longitudinal study of phonological development in late talkers. *Language, Speech, and Hearing Services in Schools*, 34, 138–153.
