# Supplementary material
Source: publisher figshare collection journal article supplement (https://asha.figshare.com/articles/dataset/_/5313454)

**Supplemental Material S11.** Forest plot of Pearson's  $r$  for the relationship between socioeconomic status (SES) and expressive language outcomes across studies. Studies are grouped by whether they included a wide or limited range of SES.

## Meta-Analysis of SES

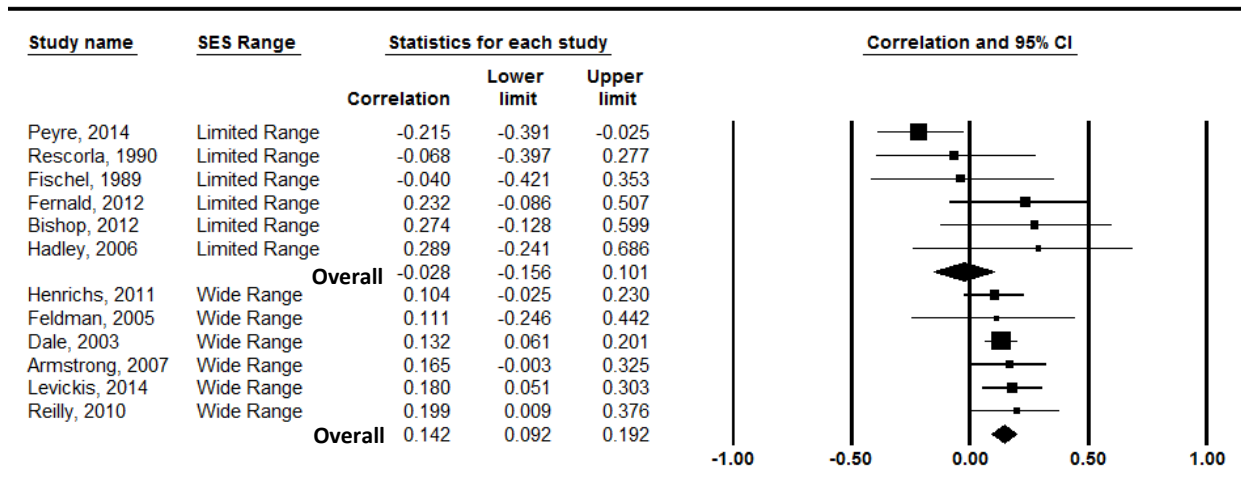

Supplement: Supplementary file 15 [file 1]
