# Supplementary material
Source: publisher figshare collection journal article supplement (https://asha.figshare.com/articles/dataset/_/5313454)

**Supplemental Material S5.** PRISMA flow chart detailing the process of study identification.

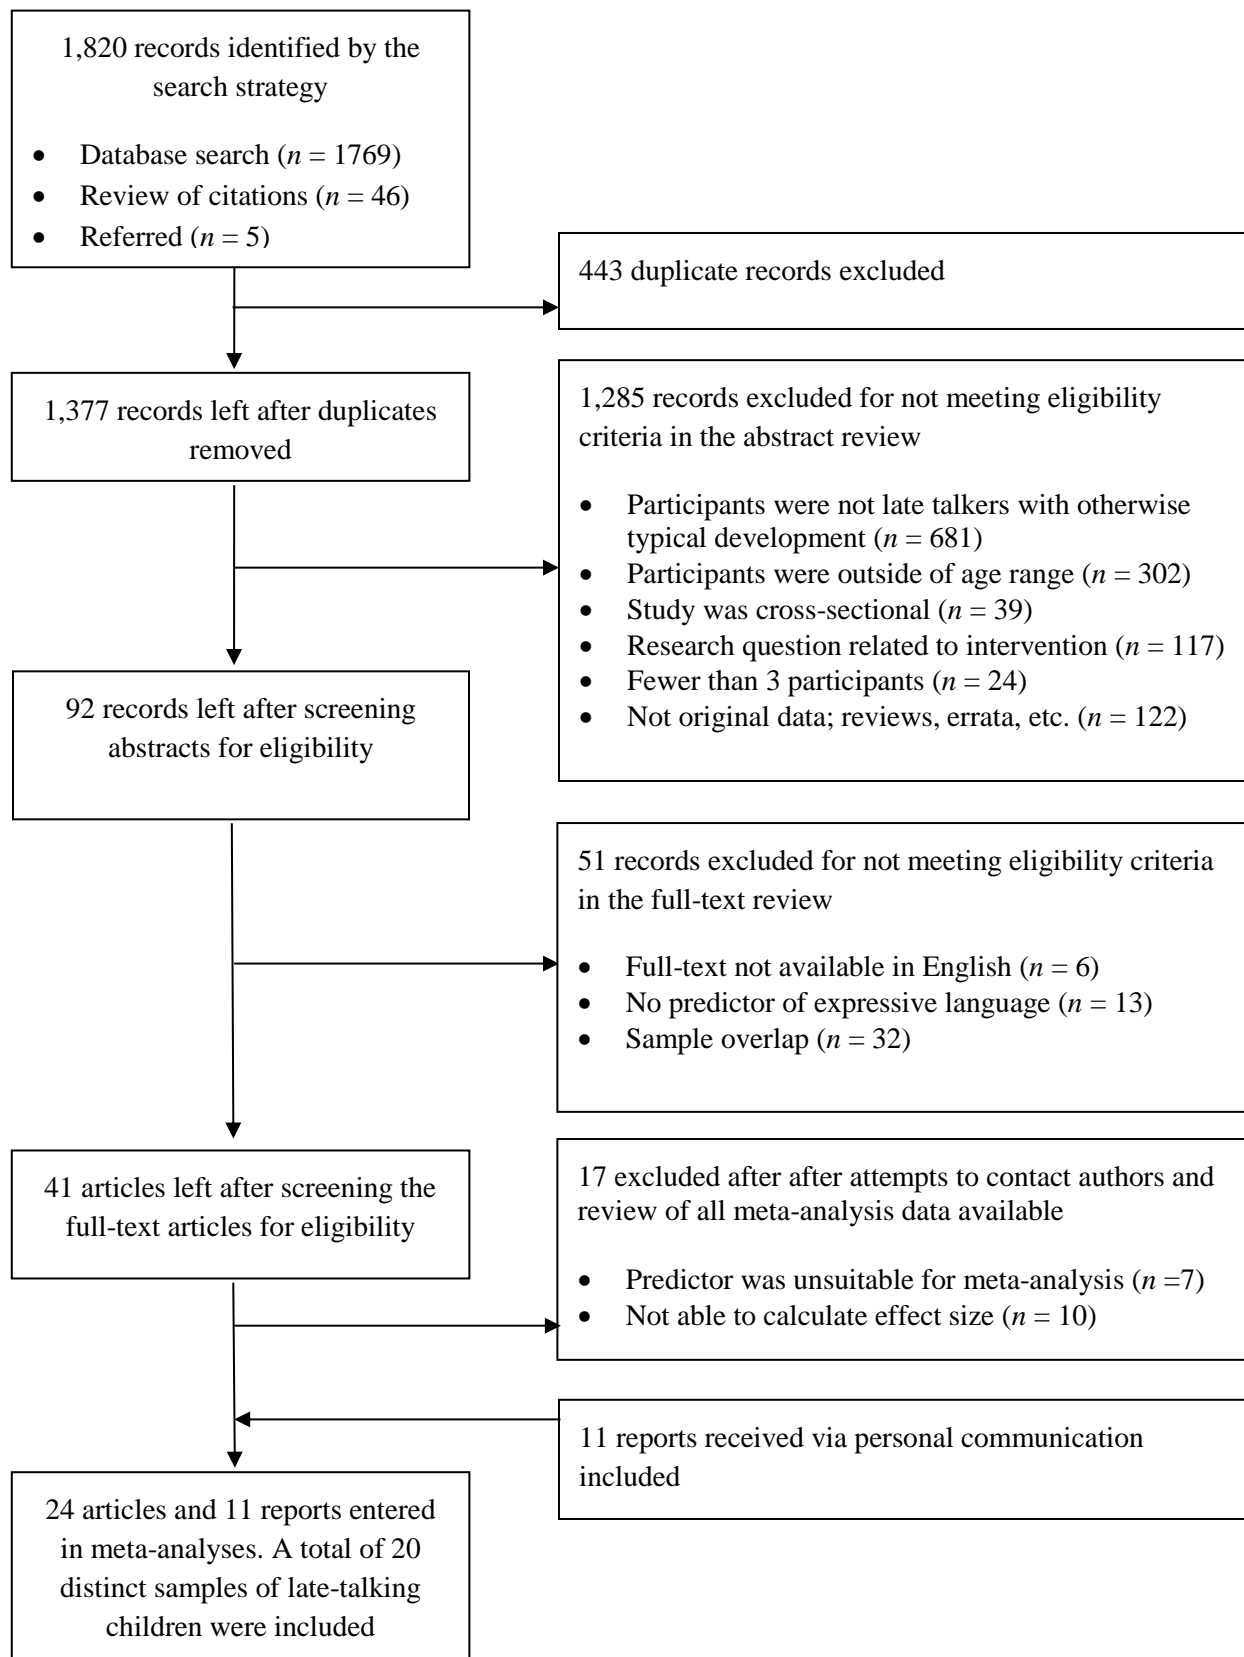

Supplement: Supplementary file 11 [file 1]
